# Supplementary material for: Food or urbanization? Assessing the diversity of urban insectivorous bats in a Neotropical city
Source: Research Square preprint supplement (doi:10.21203/rs.3.rs-7908158/v1), 2025-11-13

**SUPPLEMENTARY RESOURCE**

**Food or urbanization? Assessing the diversity of urban insectivorous bats in a Neotropical city
Urban Ecosystems**

**Rebeca Selene Miguel-Méndez1, M. Cristina MacSwiney González2, Víctor Rosas-Guerrero3, Yvonne Herrerías-Diego1, Miguel Angel Salinas-Melgoza 1, 4, Alejandro Salinas-Melgoza1***

**1 Facultad de Biología. Universidad Michoacana de San Nicolás de Hidalgo. C.P. 58004. Morelia, Michoacán, México.**

**2 Centro de Investigaciones Tropicales, Universidad Veracruzana.**

**3 Escuela Superior en Desarrollo Sustentable, Universidad Autónoma de Guerrero. C.P. 40900. Tecpan de Galeana, Guerrero, México.**

**4 Escuela Nacional de Estudios Superiores (ENES) Unidad Morelia, Universidad Nacional Autónoma de México, C.P. 58190. Morelia, Michoacán, México**

**Corresponding author: alejandro.salinas@umich.mx.**

1. List of the potentially bat species distributed in the area.

| Family | Potential species | % correct identification | Acronym | Urban | Urban Park | Transition | Echolocation call frequency | Foraging mode |
| --- | --- | --- | --- | --- | --- | --- | --- | --- |
| Emballonuridae | *Balantiopteryx plicata* | 92 | Balpli | x | x | x | High | Open |
| Mormoopidae | *Mormoops megalophylla* | 100 | Mormeg | x | x | x | High | Open |
| *Pteronotus fulvus* | 97 | Pteful | x | x | x | High | Open |
| *Pteronotus mexicanus* | 100 | Ptemex |  |  | x | High | Narrow |
| *Pteronotus psilotis* | 99 | Ptepsi |  |  |  |  |  |
| Vespertilionidae | *Corynorhinus mexicanus* | 82 | Coryno | x | x | x | High | Narrow |
| *Corynorhinus townsendii* | 81 |
| *Eptesicus fuscus* | 41 | Eptfus | x |  |  | Low | Edge |
| *Neoeptesicus furinalis* | 83 | Neotfur | x | x | x | High | Open |
| *Neoeptesicus brasiliensis* | 68.3 | Neobra | x | x | x | Low | Edge |
| *Idionycteris phyllotis* | 100 | Idiphy |  |  | x | High | Narrow |
| *Lasiurus franzii* | 75 | Lasfra |  | x | x |  |  |
| *Lasiurus xanthinus* | 76 | Lasxan | x | x | x | Low |  |
| *Lasiurus cinereus* | 84 | Lascin |  |  |  |  |  |
| *Lasiurus ega* | 53 | Lasega |  |  |  |  |  |
| *Myotis californicus* | 81.8 | Myotis | x | x | x | High | Open |
| *Myotis thysanodes* | 100 |
| *Myotis velifer* | 74 |
| *Myotis volans* | 47.4 |
| *Myotis yumanensis* | 69 |
| *Rhogeessa parvula* | 40.7 | Rhopar |  |  |  |  |  |
| Molossidae | *Eumops underwoodi* | 100 | Eumund | x | x | x | Low | Open |
| *Molossus molossus* | 69.2 | Molossus | x | x | x | Low | Open |
| *Molossus nigricans* | 66.6 |
| *Molossus sinaloae* | 54.5 |
| *Nyctinomops macrotis* | 77.2 | Nycmac | x | x | x | Low | Open |
| *Promops centralis* | 94.4 | Procen | x | x | x | Low | Open |
| *Tadarida brasiliensis* | 76 | Tadbra | x | x | x | Low | Open |
|

1. Urbanization index model and Resource availability index model

| **Urbanization index** | | | | | | | | |
| --- | --- | --- | --- | --- | --- | --- | --- | --- |
|  | **Abundance** |  | **Q0** |  | **Q1** |  | **Q2** |  |
| Predictors | Estimates ± Standard Error | p | Estimates ± Standard Error | p | Estimates ± Standard Error | p | Estimates ± Standard Error | p |
| (Intercept) | 298.43 ± 0.2 | <0.001* | 7.09 ± 0.1 | <0.001* | 2.99 ± 0.1 | <0.001* | 0.87 ± 0.1 | <0.001* |
| Transition | 0.65 ± 0.3 | 0.178 | 1.14 ± 0.1 | 0.493 | 1.18 ± 0.1 | 0.403 | 0.09 ± 0.1 | 0.584 |
| Urban | 0.44 ± 0.4 | 0.058 | 0.72 ± 0.2 | 0.154 | 0.88 ± 0.2 | 0.531 | -0.12 ±0.1 | 0.504 |
| Dry-warm season | 0.82 ± 0.1 | 0.294 | 1.06 ± 0.08 | 0.48 | 1.11 ± 0.05 | 0.045 | 0.14 ± 0.05 | 0.009* |
| Dry-cold season | 0.67 ± 0.1 | 0.038* | 0.78 ± 0.08 | 0.004* | 0.91 ± 0.05 | 0.081* | -0.04 ± 0.05 | 0.474 |
| PC1 | 0.89 ± 0.1 | 0.421 | 0.95 ± 0.05 | 0.375 | 0.99 ± 0.03 | 0.846 | 0.01 ± 0.03 | 0.778 |
| Random Effects | | | | | | | | |
| Marginal R2 / Conditional R2 | 0.146 / 0.282 | | 0.220 / 0.314 | | 0.220 / 0.381 | | 0.040 / 0.082 | |
| Formula | Abundance ~ urbanization level + season + PC1+ (1|sitio) | | Q0 ~ urbanization level + season + PC1+ (1|sitio) | | Q1 ~ urbanization level + season + PC1+ (1|sitio) | | Q2 ~ urbanization level + season + PC1+ (1|sitio) | |
|  | | | | | | | | |
| **Resource availability index** | | | | | | | | |
|  | **Abundance** | | **Q0** | | **Q1** | | **Q2** | |
| Predictors | Estimates ± Standard Error | p | Estimates ± Standard Error | p | Estimates ± Standard Error | p | Estimates ± Standard Error | p |
| (Intercept) | 272.85 ± 0.2 | <0.001* | 6.88 ± 0.1 | <0.001* | 2.98 ± 0.1 | <0.001* | 0.87 ± 0.1 | <0.001* |
| Transition | 0.6 ± 0.3 | 0.098 | 1.11 ± 0.1 | 0.595 | 1.18 ± 0.1 | 0.406 | 0.1 ± 0.1 | 0.56 |
| Urban | 0.61 ± 0.3 | 0.104 | 0.82 ± 0.1 | 0.302 | 0.89 ± 0.1 | 0.536 | -0.15 ± 0.1 | 0.353 |
| Dry-warm season | 0.82 ± 0.1 | 0.299 | 1.05 ± 0.08 | 0.528 | 1.11 ± 0.05 | 0.043* | 0.15 ± 0.05 | 0.006* |
| Dry-cold season | 0.67 ± 0.1 | 0.034* | 0.78 ± 0.08 | 0.004* | 0.91 ± 0.05 | 0.103 | -0.03 v 0.06 | 0.628 |
| PC2 | 1.18 ± 0.09 | 0.069 | 1.03 ± 0.03 | 0.39 | 0.99 ± 0.02 | 0.715 | -0.02 ± 0.02 | 0.244 |
| Random Effects | | | | | | | | |
| Marginal R2 / Conditional R2 | 0.162 / 0.290 | | 0.220 / 0.316 | | 0.221 / 0.380 | | 0.041 / 0.083 | |
| Formula | Abundance ~ urbanization level + season + PC2+ (1|sitio) | | Q0 ~ urbanization level + season + PC2+ (1|sitio) | | Q1 ~ urbanization level + season + PC2+ (1|sitio) | | Q2 ~ urbanization level + season + PC2+ (1|sitio) | |

1. Performance-Score Analysis

| **Name** | **Model** | **R2 cond.** | **R2 marg.** | **ICC** | **RMSE** | **Sigma** | **AIC weights** | **AICc weights** | **BIC weights** | **Performance-Score** |
| --- | --- | --- | --- | --- | --- | --- | --- | --- | --- | --- |
| **Abundance** | | | | | | | | | | |
| Resource availability index | glmmTMB | 0.29 | 0.162 | 0.153 | 132.33 | 1.667 | 0.735 | 0.735 | 0.735 | 80.00% |
| Urbanization index | glmmTMB | 0.282 | 0.146 | 0.16 | 135.67 | 1.642 | 0.265 | 0.265 | 0.265 | 20.00% |
| **Q0** | | | | | | | | | | |
| Urbanization index | glmerMod | 0.314 | 0.22 | 0.121 | 2.105 | 0.337 | 0.51 | 0.51 | 0.51 | 50.00% |
| Resource availability index | glmerMod | 0.316 | 0.22 | 0.123 | 2.095 | 0.335 | 0.49 | 0.49 | 0.49 | 50.00% |
| **Q1** | | | | | | | | | | |
| Urbanization index | glmerMod | 0.381 | 0.22 | 0.206 | 0.751 | 0.24 | 0.488 | 0.488 | 0.488 | 50.00% |
| Resource availability index | glmerMod | 0.38 | 0.221 | 0.204 | 0.751 | 0.24 | 0.512 | 0.512 | 0.512 | 50.00% |
| **Q2** | | | | | | | | | | |
| Resource availability index | glmerMod | 0.083 | 0.041 | 0.043 | 0.578 | 0.607 | 0.644 | 0.644 | 0.644 | 87.50% |
| Urbanization index | glmerMod | 0.082 | 0.04 | 0.044 | 0.581 | 0.611 | 0.356 | 0.356 | 0.356 | 12.50% |

1. Principal Component Analysis (PCA) of the variables of artificial light, urban noise and prey biomass.

| Importance of components: | | | |
| --- | --- | --- | --- |
|  | **PC1** | **PC2** | **PC3** |
| Standard deviation | 1.3354 | 0.9486 | 0.563 |
| Proportion of Variance | 0.5944 | 0.2999 | 0.1057 |
| Cumulative Proportion | 0.5944 | 0.8943 | 1 |

| Variable loads: | | | |
| --- | --- | --- | --- |
|  | **PC1** | **PC2** | **PC3** |
| Artificial light | 0.6568729 | -0.2939773 | 0.69433086 |
| Urban noise | 0.6719954 | -0.1893887 | -0.71592887 |
| Prey biomass | -0.3419653 | -0.9368614 | -0.07314712 |

1. Alluvial graph of dam categories at different levels of urbanization (urban, urban park and transition)


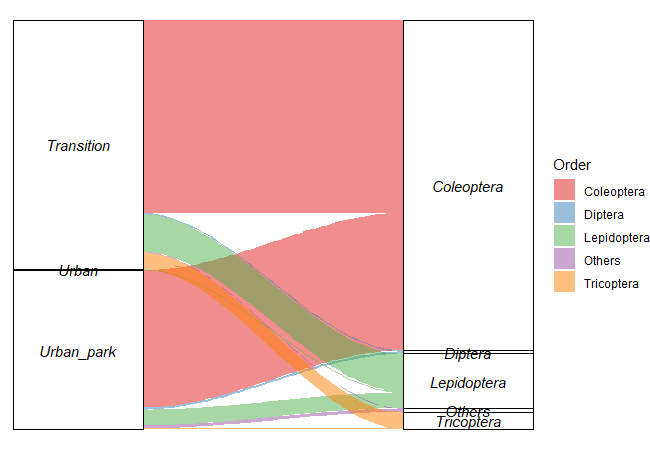


1. Range-Abundance Curves of Abundance Log10 in the urban, urban park and transition


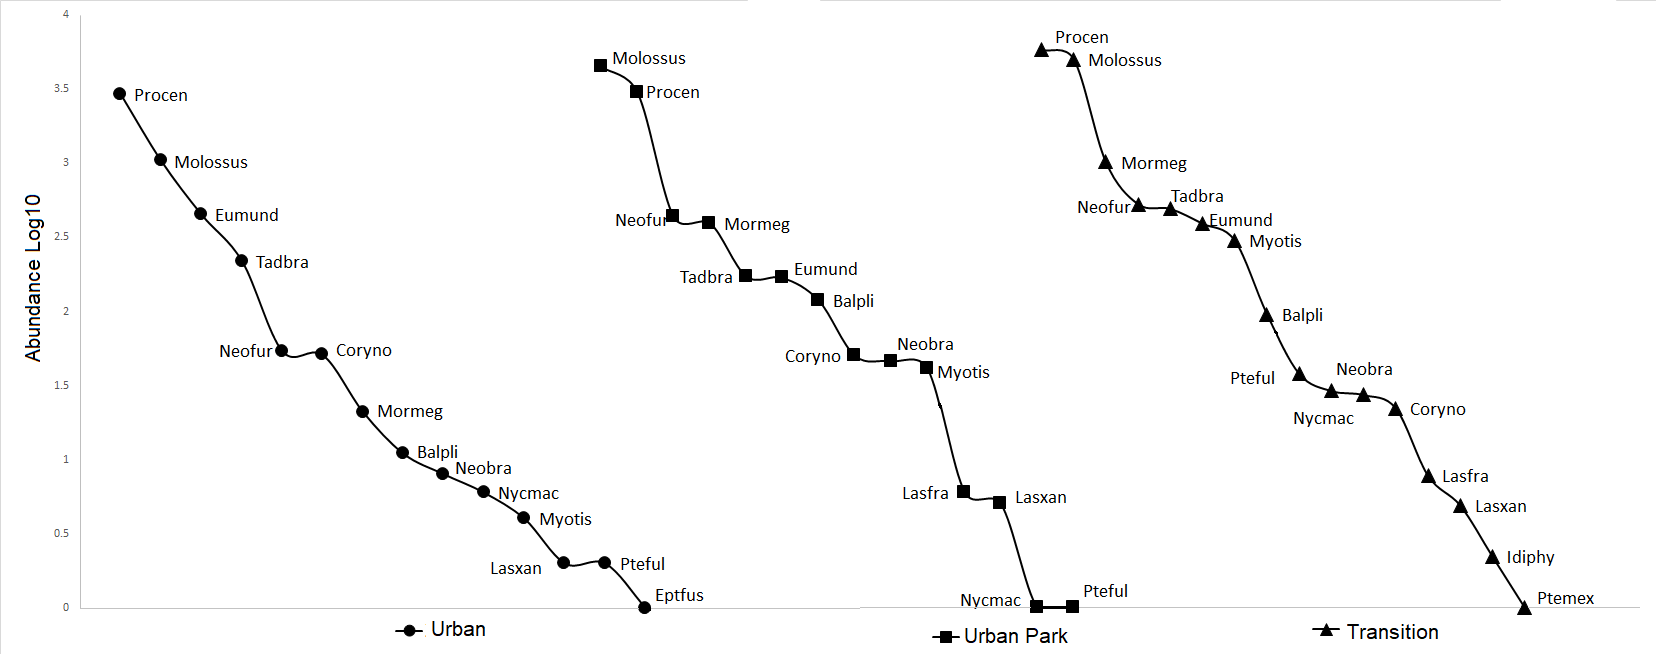


Balpli: *Balantiopteryx plicata,* Mormeg: *Mormoops megalophylla,* Pteful: *Pteronotus fulvus,* Ptemex: *Pteronotus mexicanus,* Coryno: *Corynorrynus sp.,* Eptfus*: Eptesicus fuscus.,* Neofur: *Neoptesicus furinalis* Neobra: *Neoptesicus brasiliensis,* Idiphy: *Idionycteris phyllotis,* Lasfra: *Lasiurus franzii*, Lasxan: *Lasiurus xanthinus,* Myotis: *Myotis sp.,* Eumund: *Eumops underwoodi,* Molossus:*Molossus sp.,* Nycmac*: Nyctinomops macrotis,* Procen: *Promops centralis,* Tadbra: *Tadarida brasiliensis.*

1. NMDS analysis. The points represent species abundance per site, and the circles represent site adjustment. The analysis shows that bat communities are heterogeneous across disturbance levels.


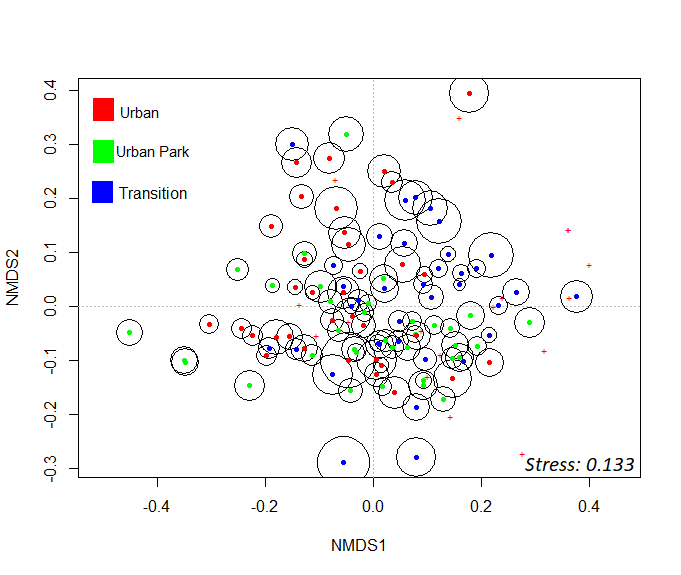

Supplement: Supplementary file 1 [file 74e73be15cf834eff8b88234.docx]
